# Supplementary material for: Elucidating the Chemical Compositions and Source Apportionment of Multi-Size Atmospheric Particulate (PM10, PM2.5 and PM1) in 2019–2020 Winter in Xinxiang, North China
Source: MDPI journal article supplement (doi:10.3390/atmos13091400), 2022-08-31
Supplement: s1 [file s1]

# Supplementary Materials: Elucidating the Chemical Compositions and Source Apportionment of Multi-Size Atmospheric Particulate (PM<sub>10</sub>, PM<sub>2.5</sub> and PM<sub>1</sub>) in 2019–2020 Winter in Xinxiang, North China

Huanjia Liu <sup>1,2,3,\*</sup>, Mengke Jia <sup>1</sup>, Ke You <sup>4</sup>, Jingjing Wang <sup>5</sup>, Jie Tao <sup>5</sup>, Hengzhi Liu <sup>1</sup>, Ruiqin Zhang <sup>2</sup>, Lanqing Li <sup>1</sup>, Mengyuan Xu <sup>1</sup>, Yan Ren <sup>1</sup>, Yijie Zhao <sup>1</sup>, Yongli Liu <sup>1</sup>, Ke Cheng <sup>1</sup>, Yujuan Fan <sup>1</sup> and Juexiu Li <sup>2,3,6</sup>

<sup>1</sup> Key Laboratory of Yellow River and Huai River Water Environment and Pollution Control, Ministry of Education, Henan Key Laboratory for Environmental Pollution Control, School of Environment, Henan Normal University, Xinxiang 453007, China

<sup>2</sup> School of Ecology & Environment, Zhengzhou University, Zhengzhou 450001, China

<sup>3</sup> College of Chemistry, Zhengzhou University, Zhengzhou 450001, China

<sup>4</sup> Henan Environment Monitoring Center, Zhengzhou 450001, China

<sup>5</sup> Zhengzhou Ecological and Environmental Monitoring Center of Henan Province, Zhengzhou 450001, China

<sup>6</sup> School of Energy and Environment, Zhongyuan University of Technology, Zhengzhou 450007, China

\* Correspondence: liuhuanjia@htu.edu.cn

**Table captions**

---

|          |                                                                                                                                                       |
|----------|-------------------------------------------------------------------------------------------------------------------------------------------------------|
| Table S1 | Some nomenclature in this study                                                                                                                       |
| Table S2 | Characteristics of research region                                                                                                                    |
| Table S3 | MDL and error fraction used in calculating the uncertainties by EPA PMF                                                                               |
| Table S4 | Average mass concentrations of chemical species in PM <sub>10</sub> , PM <sub>2.5</sub> , and PM <sub>1</sub> and SOR NOR during the various periods. |

---

**Figure captions**

---

|           |                                                                                                                                                                    |
|-----------|--------------------------------------------------------------------------------------------------------------------------------------------------------------------|
| Figure S1 | Correlation of reconstructed PM <sub>10</sub> , PM <sub>2.5</sub> , and PM <sub>1</sub> and gravimetric mass concentration in 2019–2020 winter for Xinxiang.       |
| Figure S2 | The correlation relation between the ratios of PM <sub>1</sub> /PM <sub>2.5</sub> and PM <sub>2.5</sub> /PM <sub>10</sub> with RH and WS.                          |
| Figure S3 | PMF source factor profiles for the PM samples through the entire study period in Xinxiang in terms of concentrations ( $\mu\text{g m}^{-3}$ ) and percentages (%). |

---

**Table S1.** Some nomenclature in this study.

| Abbreviation       | Interpretation                                                                            |
|--------------------|-------------------------------------------------------------------------------------------|
| AMS                | Aerosol Mass Spectrometer                                                                 |
| BOM                | Bureau of Meteorology Australia                                                           |
| BTH                | Beijing–Tianjin–Hebei                                                                     |
| CLP/CP             | Clean Period                                                                              |
| con                | Concentration                                                                             |
| EC                 | Element Carbon                                                                            |
| EF                 | Enrichment Factor                                                                         |
| HMs                | Heavy Metals                                                                              |
| HPP/HP             | Heavy Pollution Period                                                                    |
| HYSPLIT            | Hybrid Single Particle Lagrangian Integrated Trajectory                                   |
| ICP-AES            | Inductively Coupled Plasma Atomic Emission Spectrometry                                   |
| MD                 | Mineral Dust                                                                              |
| MDL                | Method Detection Limit                                                                    |
| MEEP               | Ministry of Ecology and Environment Protection of China                                   |
| NAAQS              | National Ambient Air Standard                                                             |
| NCAR               | National Center for Atmospheric Research                                                  |
| NCEP               | National Centers for Environmental Prediction                                             |
| NOAA ARL           | US National Oceanic and Atmospheric Administration Air Resources Laboratory               |
| NOR                | Nitrogen Oxidation Ratio                                                                  |
| NR-PM <sub>1</sub> | Non-Refractory Submicron Aerosol                                                          |
| OC                 | Organic Carbon                                                                            |
| OM                 | Organic Matter                                                                            |
| PM                 | Particulate Matter                                                                        |
| PM <sub>10</sub>   | Inhalable Particles(particulate matter with aerodynamic diameter smaller than 10 µm)      |
| PM <sub>2.5</sub>  | Fine Particulate Matter(particulate matter with aerodynamic diameter smaller than 2.5 µm) |
| PM <sub>1</sub>    | Submicron Aerosols(particulate matter with aerodynamic diameter smaller than 1 µm)        |
| PM <sub>chem</sub> | Chemically Reconstructed PM Mass Concentration                                            |
| PM <sub>grav</sub> | Gravimetric PM Mass Concentration                                                         |
| PMF                | Positive Matrix Factorization                                                             |
| POA                | Primary Organic Aerosol                                                                   |
| POC                | Primary Organic Carbon                                                                    |
| PSCF               | Potential Source Contribution Function                                                    |
| PTFE               | Polytetrafluoroethylene                                                                   |
| QA/QC              | Quality Assurance and Quality Control                                                     |
| SA                 | Secondary Aerosol                                                                         |
| SNA                | Sulfate, Nitrate, and Ammonium                                                            |
| SOA                | Secondary Organic Aerosol                                                                 |
| SOC                | Secondary Organic Carbon                                                                  |
| SOR                | Sulfur Oxidation Ratio                                                                    |
| SP                 | Slightly Pollution Period                                                                 |
| SP-AMS             | Single Particle Aerosol Mass Spectrometer                                                 |
| THMs               | Total Heavy Metals                                                                        |
| TOR                | Thermal–Optical Reflectance                                                               |
| Unc                | Uncertainty                                                                               |
| US EPA             | US Environmental Protection Agency                                                        |
| WPSCF              | Weighted Potential Source Contribution Function                                           |
| WSII               | Water–Soluble Inorganic Ions                                                              |

**Table S2.** Characteristics of research region.

| Species | GDP<br>(10000 Yuan)      | Consumption of Coal<br>by Industrial Sector<br>(10000 tons) | Consumption of<br>Nitrogenous Fertilizer<br>(ton)         | Cultivated Land Area<br>(1000 hectares)          | VOCs<br>Emission<br>(ton) |
|---------|--------------------------|-------------------------------------------------------------|-----------------------------------------------------------|--------------------------------------------------|---------------------------|
| amount  | 29,181,771 <sup>a</sup>  | 1234.79 <sup>a</sup>                                        | 159,870 <sup>a</sup>                                      | 475.66 <sup>b</sup>                              | 1389.0 <sup>a</sup>       |
| species | Civil Vehicles<br>(unit) | SO <sub>2</sub> Emission by<br>industrial sector<br>(ton)   | NO <sub>x</sub> Emission by<br>industrial sector<br>(ton) | climate type                                     | land uses                 |
| amount  | 1,057,602 <sup>a</sup>   | 3908.3 <sup>a</sup>                                         | 8596.1 <sup>a</sup>                                       | Warm temperate<br>continental monsoon<br>climate | Arable land               |

<sup>a</sup> by the end of 2019. <sup>b</sup> by the end of 2018. Data source: Henan Statistical Yearbook 2020 and Xinxiang Statistical Yearbook 2020.

**Table S3.** MDL and error fraction used in calculating the uncertainties by EPA PMF.

|                           | Cl <sup>-</sup> | SO <sub>4</sub> <sup>2-</sup> | NO <sub>3</sub> <sup>-</sup> | Na <sup>+</sup> | NH <sub>4</sub> <sup>+</sup> | K <sup>+</sup> | Mg <sup>2+</sup> | Ca <sup>2+</sup> |        |
|---------------------------|-----------------|-------------------------------|------------------------------|-----------------|------------------------------|----------------|------------------|------------------|--------|
| MDL (μg m <sup>-3</sup> ) | 0.019           | 0.019                         | 0.019                        | 0.009           | 0.009                        | 0.009          | 0.009            | 0.009            |        |
| Error fraction%           | 10              | 10                            | 10                           | 10              | 10                           | 10             | 10               | 10               |        |
|                           | Al              | Fe                            | As                           | Ba              | Cd                           | Co             | Cr               | Cu               | Mn     |
| MDL (μg m <sup>-3</sup> ) | 0.0004          | 0.0004                        | 0.001                        | 0.0001          | 0.0001                       | 0.0004         | 0.0004           | 0.0004           | 0.0001 |
| Error fraction%           | 10              | 10                            | 10                           | 10              | 10                           | 10             | 10               | 10               | 10     |
|                           | Ni              | Pb                            | Sb                           | Ti              | V                            | Zn             | OC               | EC               | SUM    |
| MDL (μg m <sup>-3</sup> ) | 0.0004          | 0.001                         | 0.002                        | 0.0001          | 0.001                        | 0.0004         | 0.004            | 0.001            | 0.1    |
| Error fraction%           | 10              | 10                            | 10                           | 10              | 10                           | 10             | 10               | 10               | 10     |

#### Detail description about EPA PMF 5.0 as follows:

The US Environmental Protection Agency's PMF 5.0 receptor model was applied for PM source apportionment of Xinxiang area in this study. For a data matrix  $x$  with samples  $i$  by chemical species  $j$  dimensions, the goal of PMF is to identify the number factors  $p$ , the species profile  $f$  of each source, the mass  $g$  contributed by each factor to each individual sample, and the residual  $e$  (Equation (S1)) [1,2]:

$$x_{ij} = \sum_{k=1}^p g_{ik} f_{kj} + e_{ij} \quad (\text{S1})$$

According to EPA PMF 5.0 user guide,  $Q$  is a critical parameter. The species profile  $f$  and the mass contribution  $g$  are obtained in the case of the minimum the object function  $Q$ , based upon the uncertainties ( $Unc$ ) of each data (Equation (S2)) [1,2]:

$$Q = \sum_{i=1}^n \sum_{j=1}^m \left[ \frac{x_{ij} - \sum_{k=1}^p g_{ik} f_{kj}}{Unc_{ij}} \right]^2 \quad (\text{S2})$$

The theoretical  $Q$  ( $Q_{theoretical}$ ) can be calculated as Equation (S3), and the best PMF solution should have  $Q/Q_{theoretical}$  with the value of  $\sim 1$  [1,2].

$$Q_{theoretical} = i \times j - p \times (i + j) \quad (\text{S3})$$

When applied EPA PMF 5.0, a number of factors were selected after the evaluation of the following steps:

(1) Signal-to-noise. Signal-to-noise values less than 0.5 were recorded as bad, 0.5 to 1 were recorded as weak, and above 1 were recognize as strong [1]. Besides, a comparison between observed values (input data) and predicted values (modeled) is used to evaluate the fitting results of the PMF model. Chemical components do not have a strong correlation between predicted values and observed values should be defined as weak species or be removed from the simulation.

(2) The goodness-of-fit parameters, i.e.,  $Q_{robust}$  and  $Q_{true}$ , were adjusted changing the number of factors, and compared with  $Q_{theoretical}$ .  $Q_{robust}$ , the goodness-of-fit parameter calculated excluding outliers, defined as samples for which the scaled residual was greater than 4 and  $Q_{true}$  was calculated including all points. Once a reasonable solution was found, the uncertainties in the modeled solution were estimated by using the bootstrapping technique.

(3) Residual. The scaled residuals were used to assess the performance of the modeled sources. The selected number of factors in both fractions led to solutions with 90–100% of the scaled residuals located between the optimal range  $-3$  to  $+3$ .

(4) Ppeak function of PMF 5.0 was used to interpret the factor profile. The solution of model run should be rotated back to the real solution using the Ppeak function. Fpeak run was also performed in this study by using the strength of Fpeak rotation from  $-1$  to  $+1$ . Moreover, Fpeak without rotation (Fpeak = 0) was also executed. We have considered all Fpeak rotations and physical meaning and PMF result without Fpeak rotation was selected (Fpeak = 0) to explain source profile and source contribution.

In general, the optimal number of factors of PM in Xinxiang were identified after the above steps were evaluated. The model was run 20 times with six factors. All runs converged and a global minimum was found. The number of factors ranged from 4 to 9 and was examined by checking the above parameters. The most optimal number of factors were selected in Xinxiang in North China.

**Table S4.** Average mass concentrations of chemical species in PM<sub>10</sub>, PM<sub>2.5</sub>, and PM<sub>1</sub> and SOR NOR during the various periods.

|                  |                               | 2019–2020 Winter |        |        |        |       | Average |
|------------------|-------------------------------|------------------|--------|--------|--------|-------|---------|
|                  |                               | PP1              | PP2    | PP3    | PP     | CP    |         |
| PM <sub>10</sub> | PM <sub>10</sub>              | 217.39           | 199.06 | 171.63 | 185.55 | 74.36 | 155.53  |
|                  | Cl <sup>-</sup>               | 6.97             | 7.95   | 3.57   | 5.29   | 1.63  | 4.25    |
|                  | SO <sub>4</sub> <sup>2-</sup> | 39.75            | 16.44  | 32.00  | 29.23  | 6.56  | 23.03   |
|                  | NO <sub>3</sub> <sup>-</sup>  | 48.72            | 42.07  | 42.12  | 43.27  | 12.36 | 35.49   |
|                  | Na <sup>+</sup>               | 0.75             | 0.81   | 0.51   | 0.63   | 0.32  | 0.54    |
|                  | NH <sub>4</sub> <sup>+</sup>  | 27.30            | 15.79  | 20.60  | 20.90  | 4.47  | 16.68   |
|                  | OC                            | 22.70            | 31.27  | 15.63  | 20.36  | 10.37 | 17.59   |
|                  | EC                            | 9.80             | 10.46  | 8.02   | 8.71   | 4.91  | 7.72    |
|                  | POC                           | 12.08            | 12.89  | 9.89   | 10.74  | 6.06  | 9.51    |
|                  | SOC                           | 10.62            | 18.38  | 5.75   | 9.62   | 4.31  | 8.07    |
|                  | MD                            | 27.43            | 52.29  | 28.47  | 31.95  | 23.01 | 28.80   |
|                  | SOR                           | 0.63             | 0.32   | 0.62   | 0.55   | 0.26  | 0.47    |
|                  | NOR                           | 0.33             | 0.28   | 0.34   | 0.32   | 0.18  | 0.29    |
|                  | Al                            | 1.65             | 3.19   | 1.67   | 1.92   | 1.62  | 1.79    |
|                  | Fe                            | 2.52             | 3.46   | 1.94   | 2.36   | 1.50  | 2.09    |
|                  | K                             | 1.55             | 2.34   | 1.12   | 1.46   | 0.81  | 1.27    |
|                  | As                            | 0.02             | 0.02   | 0.01   | 0.01   | 0.01  | 0.01    |
|                  | Ba                            | 0.06             | 0.09   | 0.05   | 0.06   | 0.03  | 0.05    |
|                  | Cd                            | 0.01             | 0.02   | 0.01   | 0.01   | 0.01  | 0.01    |
|                  | Co                            | 0.01             | 0.01   | 0.003  | 0.005  | 0.002 | 0.004   |
|                  | Cr                            | 0.02             | 0.03   | 0.02   | 0.02   | 0.02  | 0.02    |

|                   |                               |        |        |        |        |       |        |
|-------------------|-------------------------------|--------|--------|--------|--------|-------|--------|
| PM <sub>2.5</sub> | Cu                            | 0.04   | 0.08   | 0.03   | 0.04   | 0.01  | 0.04   |
|                   | Mn                            | 0.12   | 0.15   | 0.08   | 0.10   | 0.05  | 0.09   |
|                   | Ni                            | 0.03   | 0.03   | 0.01   | 0.02   | 0.01  | 0.02   |
|                   | Pb                            | 0.15   | 0.16   | 0.11   | 0.12   | 0.05  | 0.10   |
|                   | Sb                            | 0.01   | 0.02   | 0.01   | 0.01   | 0.005 | 0.01   |
|                   | Se                            | 0.002  | 0.001  | 0.001  | 0.001  | 0.001 | 0.001  |
|                   | Ti                            | 0.11   | 0.21   | 0.13   | 0.14   | 0.11  | 0.13   |
|                   | V                             | 0.003  | 0.005  | 0.003  | 0.004  | 0.003 | 0.003  |
|                   | Zn                            | 0.43   | 0.37   | 0.29   | 0.33   | 0.09  | 0.26   |
|                   | TEs                           | 12.04  | 22.02  | 12.46  | 13.78  | 8.39  | 12.06  |
|                   | PM <sub>2.5</sub>             | 171.34 | 144.15 | 136.31 | 143.58 | 52.91 | 120.07 |
|                   | Cl <sup>-</sup>               | 6.33   | 6.58   | 3.08   | 4.59   | 1.29  | 3.73   |
|                   | SO <sub>4</sub> <sup>2-</sup> | 31.97  | 12.02  | 25.91  | 23.53  | 5.19  | 18.77  |
|                   | NO <sub>3</sub> <sup>-</sup>  | 44.73  | 35.16  | 38.38  | 38.87  | 10.39 | 31.49  |
|                   | Na <sup>+</sup>               | 0.51   | 0.45   | 0.31   | 0.40   | 0.18  | 0.34   |
|                   | NH <sub>4</sub> <sup>+</sup>  | 24.54  | 14.04  | 19.95  | 19.49  | 4.63  | 15.64  |
|                   | OC                            | 22.00  | 27.78  | 14.30  | 18.61  | 8.46  | 15.98  |
|                   | EC                            | 10.61  | 8.66   | 7.62   | 8.20   | 3.85  | 7.08   |
|                   | POC                           | 15.49  | 12.65  | 11.12  | 11.98  | 5.63  | 10.33  |
|                   | SOC                           | 6.51   | 15.13  | 3.18   | 6.63   | 2.84  | 5.65   |
|                   | MD                            | 7.72   | 14.75  | 6.29   | 8.14   | 7.23  | 7.90   |
|                   | SOR                           | 0.58   | 0.26   | 0.57   | 0.50   | 0.22  | 0.43   |
|                   | NOR                           | 0.31   | 0.25   | 0.32   | 0.30   | 0.16  | 0.26   |
|                   | Al                            | 0.42   | 0.79   | 0.35   | 0.44   | 0.48  | 0.45   |
|                   | Fe                            | 1.06   | 1.72   | 0.66   | 0.97   | 0.55  | 0.86   |
|                   | K                             | 1.08   | 1.46   | 0.70   | 0.94   | 0.46  | 0.82   |
|                   | As                            | 0.02   | 0.01   | 0.01   | 0.01   | 0.005 | 0.01   |
|                   | Ba                            | 0.02   | 0.03   | 0.01   | 0.02   | 0.02  | 0.02   |
|                   | Cd                            | 0.01   | 0.01   | 0.003  | 0.01   | 0.003 | 0.005  |
|                   | Co                            | 0.001  | 0.002  | 0.001  | 0.001  | 0.001 | 0.001  |
|                   | Cr                            | 0.02   | 0.03   | 0.01   | 0.02   | 0.01  | 0.01   |
|                   | Cu                            | 0.03   | 0.05   | 0.02   | 0.03   | 0.01  | 0.02   |
|                   | Mn                            | 0.07   | 0.09   | 0.04   | 0.06   | 0.03  | 0.05   |
|                   | Ni                            | 0.01   | 0.03   | 0.004  | 0.01   | 0.004 | 0.01   |
|                   | Pb                            | 0.12   | 0.11   | 0.08   | 0.09   | 0.03  | 0.08   |
|                   | Sb                            | 0.01   | 0.01   | 0.01   | 0.01   | 0.004 | 0.01   |
|                   | Se                            | 0.001  | 0.001  | 0.001  | 0.001  | 0.001 | 0.001  |
|                   | Ti                            | 0.03   | 0.06   | 0.04   | 0.04   | 0.04  | 0.04   |
|                   | V                             | 0.001  | 0.002  | 0.001  | 0.001  | 0.001 | 0.001  |
|                   | Zn                            | 0.33   | 0.27   | 0.20   | 0.24   | 0.08  | 0.20   |
|                   | TEs                           | 4.03   | 7.23   | 3.16   | 4.11   | 2.90  | 3.79   |
| PM <sub>1</sub>   | PM <sub>1</sub>               | 139.28 | 100.98 | 95.15  | 102.97 | 36.24 | 85.64  |
|                   | Cl <sup>-</sup>               | 4.55   | 4.97   | 2.09   | 3.22   | 1.22  | 2.64   |
|                   | SO <sub>4</sub> <sup>2-</sup> | 19.73  | 7.21   | 14.29  | 13.55  | 4.09  | 11.05  |
|                   | NO <sub>3</sub> <sup>-</sup>  | 32.22  | 25.20  | 25.68  | 26.82  | 9.00  | 22.61  |
|                   | Na <sup>+</sup>               | 0.33   | 0.28   | 0.20   | 0.25   | 0.15  | 0.23   |
|                   | NH <sub>4</sub> <sup>+</sup>  | 19.63  | 12.23  | 14.19  | 14.71  | 4.53  | 12.16  |
|                   | OC                            | 16.12  | 19.27  | 8.52   | 12.45  | 6.54  | 10.76  |
|                   | EC                            | 7.78   | 6.05   | 5.32   | 5.98   | 3.00  | 5.17   |
|                   | POC                           | 8.35   | 6.49   | 5.71   | 6.41   | 3.21  | 5.54   |
|                   | SOC                           | 7.77   | 12.79  | 2.81   | 6.04   | 3.32  | 5.22   |

|     |        |        |        |        |        |        |
|-----|--------|--------|--------|--------|--------|--------|
| MD  | 3.31   | 6.63   | 1.84   | 3.16   | 2.41   | 2.93   |
| SOR | 0.47   | 0.19   | 0.43   | 0.38   | 0.18   | 0.33   |
| NOR | 0.24   | 0.20   | 0.24   | 0.23   | 0.14   | 0.21   |
| Al  | 0.14   | 0.40   | 0.06   | 0.15   | 0.13   | 0.14   |
| Fe  | 0.60   | 0.67   | 0.30   | 0.44   | 0.22   | 0.38   |
| K   | 0.81   | 1.02   | 0.51   | 0.67   | 0.37   | 0.59   |
| As  | 0.01   | 0.01   | 0.01   | 0.008  | 0.004  | 0.01   |
| Ba  | 0.01   | 0.02   | 0.005  | 0.008  | 0.005  | 0.01   |
| Cd  | 0.003  | 0.01   | 0.002  | 0.003  | 0.002  | 0.003  |
| Co  | 0.0004 | 0.001  | 0.0003 | 0.0004 | 0.0003 | 0.0004 |
| Cr  | 0.01   | 0.01   | 0.003  | 0.006  | 0.001  | 0.005  |
| Cu  | 0.02   | 0.03   | 0.01   | 0.02   | 0.008  | 0.01   |
| Mn  | 0.05   | 0.06   | 0.03   | 0.04   | 0.02   | 0.03   |
| Ni  | 0.004  | 0.01   | 0.003  | 0.004  | 0.002  | 0.004  |
| Pb  | 0.08   | 0.08   | 0.06   | 0.06   | 0.03   | 0.05   |
| Sb  | 0.01   | 0.01   | 0.006  | 0.01   | 0.003  | 0.006  |
| Se  | 0.001  | 0.001  | 0.001  | 0.001  | 0.001  | 0.001  |
| Ti  | 0.01   | 0.02   | 0.01   | 0.01   | 0.01   | 0.01   |
| V   | 0.001  | 0.0004 | 0.0003 | 0.0004 | 0.0003 | 0.0004 |
| Zn  | 0.21   | 0.18   | 0.14   | 0.16   | 0.07   | 0.13   |
| TEs | 2.10   | 3.08   | 1.31   | 1.84   | 1.23   | 1.65   |

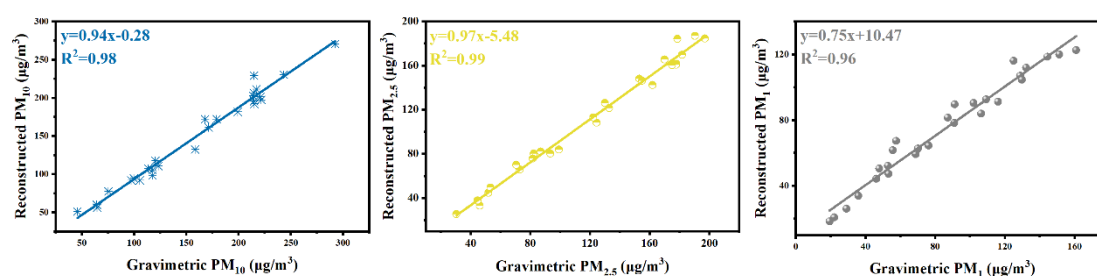

Figure S1. Correlation of reconstructed PM<sub>10</sub>, PM<sub>2.5</sub>, and PM<sub>1</sub> and gravimetric mass concentration in 2019–2020 winter for Xinxiang.

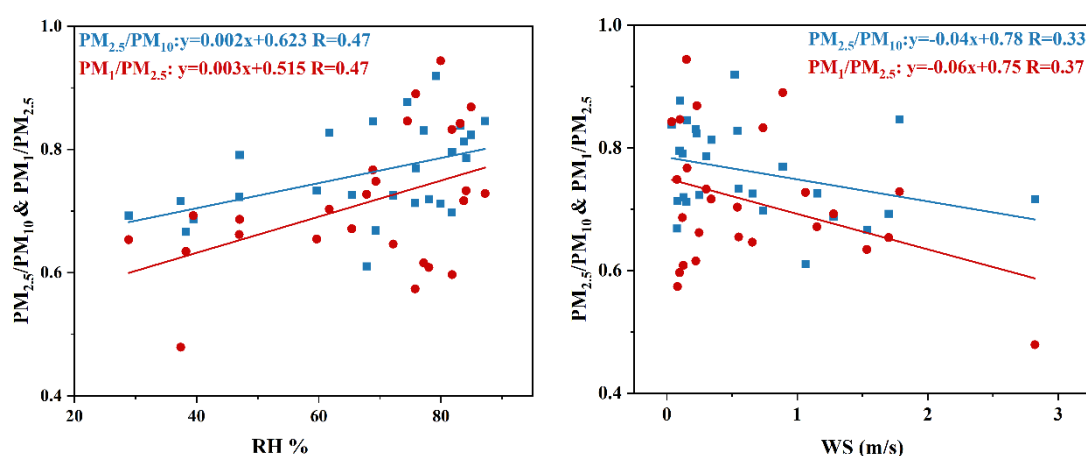

Figure S2. The correlation relation between the ratios of PM<sub>1</sub>/PM<sub>2.5</sub> and PM<sub>2.5</sub>/PM<sub>10</sub> with RH and WS.

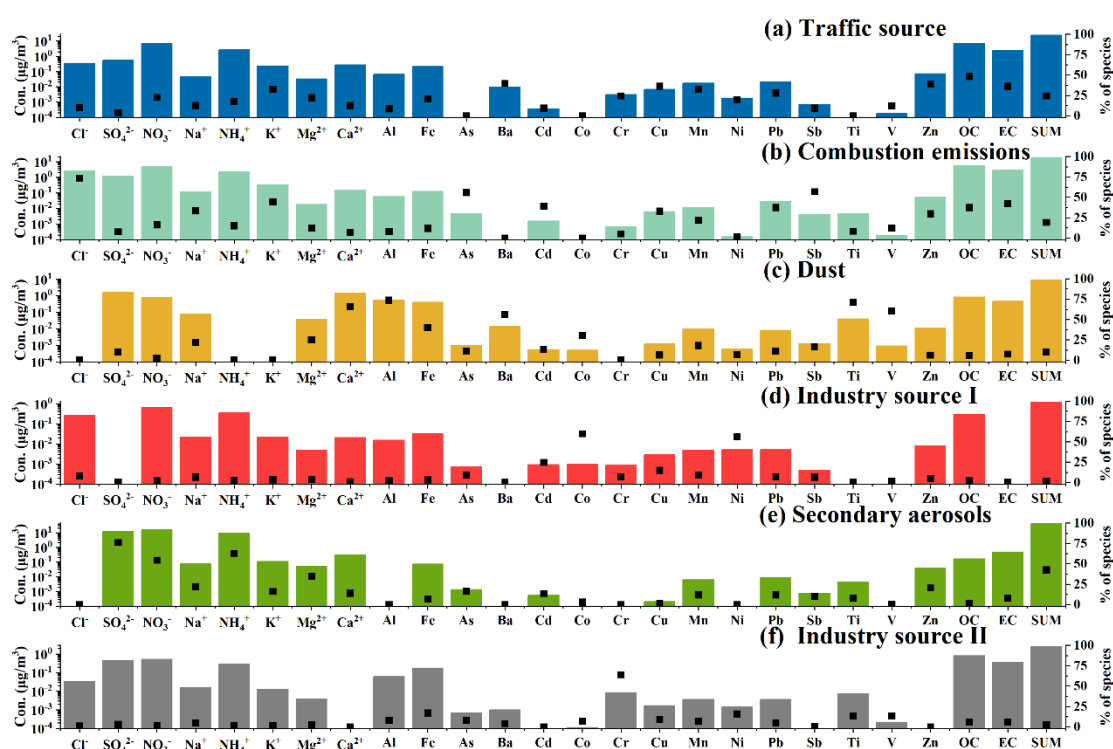

**Figure S3.** PMF source factor profiles for the PM samples through the entire study period in Xinxiang in terms of concentrations ( $\mu\text{g m}^{-3}$ ) and percentages (%).

## Reference

1. United States Environmental Protection Agency (USEPA). Positive Matrix Factorization (PMF) 5.0 Fundamentals and User Guide, **2014**.
2. Liu, J.W.; Chen, Y.J.; Chao, S.H.; Chao, H.B.; Zhang, A.C.; Yang, Y. Emission control priority of  $\text{PM}_{2.5}$ -bound heavy metals in different seasons: A comprehensive analysis from health risk perspective. *Sci. Total Environ.* **2018**, *644*, 20–30; DOI:10.1016/j.scitotenv.2018.06.226.
