# Supplementary material for: Elucidating the Chemical Compositions and Source Apportionment of Multi-Size Atmospheric Particulate (PM10, PM2.5 and PM1) in 2019–2020 Winter in Xinxiang, North China
Source: MDPI journal article supplement (doi:10.3390/atmos13091400), 2022-08-31
Supplement: s1 [file s1]

Archive with 1 entries (1 files):
- atmosphere-1850545-Supplementary.pdf
